# Supplementary material
Source: publisher site journal article supplement (https://www.dovepress.com/article/580403)
Supplement: Supplementary file 1 [file 580403%20Supplementary%20Materials.docx]

**
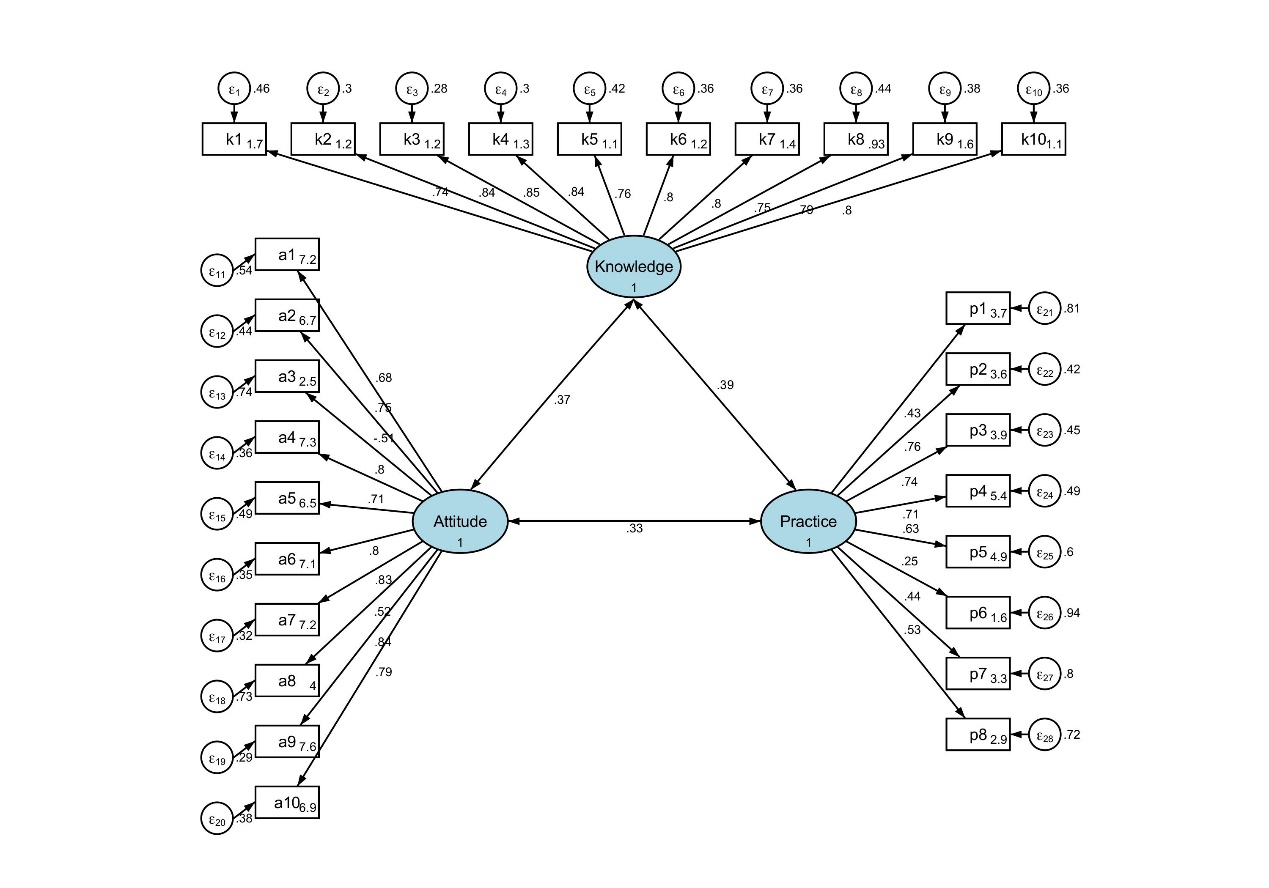
**

**Figure S1. Confirmatory factor analysis.**

**Table S1. Univariate and Multivariate Regression Analysis of Knowledge Scores**

| Knowledge | Univariate Analysis |  | Multivariate Analysis |  |
| --- | --- | --- | --- | --- |
| OR (95%CI) | P | OR (95%CI) | P |
| Gender |  |  |  |  |
| Male |  |  |  |  |
| Female | 0.930 (0.663,1.304) | 0.674 |  |  |
| Age |  |  |  |  |
| 60-69 years |  |  |  |  |
| 70-79 years | 0.776 (0.507,1.187) | 0.242 |  |  |
| 80 years and above | 0.754 (0.505,1.124) | 0.166 |  |  |
| Residence |  |  |  |  |
| Rural |  |  |  |  |
| Urban | 2.108 (1.059,4.369) | 0.038 | 1.334 (0.535,3.328) | 0.537 |
| Education |  |  |  |  |
| Junior high school or below |  |  |  |  |
| High school/technical secondary school | 2.792 (1.454,5.492) | 0.002 | 3.278 (1.478,7.271) | 0.003 |
| Associate degree | 2.058 (1.078,4.015) | 0.031 | 1.893 (0.833,4.304) | 0.128 |
| Bachelor's degree or above | 2.471 (1.382,4.536) | 0.003 | 2.476 (1.148,5.339) | 0.021 |
| Marital status |  |  |  |  |
| Married |  |  |  |  |
| Other | 1.169 (0.704,1.957) | 0.548 |  |  |
| Current or pre-retirement occupation |  |  |  |  |
| Healthcare-related industry |  |  |  |  |
| Non-healthcare-related industry | 0.151 (0.065,0.308) | <0.001 | 0.191 (0.085,0.429) | <0.001 |
| Household per capita monthly income (Yuan) |  |  |  |  |
| <5000 |  |  |  |  |
| 5000-10,000 | 0.917 (0.555,1.511) | 0.735 |  |  |
| 10,000-20,000 | 0.931 (0.556,1.556) | 0.786 |  |  |
| >20,000 | 1.226 (0.633,2.389) | 0.547 |  |  |
| Live alone |  |  |  |  |
| No |  |  |  |  |
| Yes | 1.251 (0.753,2.101) | 0.391 |  |  |
| BMI |  |  |  |  |
| <18.5 |  |  |  |  |
| 18.5-23.9 | 0.720 (0.314,1.605) | 0.426 |  |  |
| 24.0-27.9 | 1.082 (0.456,2.502) | 0.855 |  |  |
| >=28.0 | 0.978 (0.329,2.894) | 0.968 |  |  |
| Comorbidities such as diabetes mellitus, hypertension, hyperlipidemia, hyperuricemia or coronary heart disease |  |  |  |  |
| No |  |  |  |  |
| Yes | 1.130 (0.781,1.639) | 0.518 |  |  |
| Diagnosed with VTE? |  |  |  |  |
| No |  |  |  |  |
| Yes | 1.455 (0.867,2.481) | 0.160 |  |  |
| Have you received education or information regarding VTE from a hospital or other medical institution? |  |  |  |  |
| No |  |  |  |  |
| Yes | 9.573 (5.388,18.389) | <0.001 | 9.856 (5.218,18.617) | <0.001 |

VTE, venous thromboembolism.

**Table S2. Univariate and Multivariate Regression Analysis of Attitude Scores**

| **Attitude** | Univariate Analysis |  | Multivariate Analysis |  |
| --- | --- | --- | --- | --- |
| OR (95%CI) | P | OR (95%CI) | P |
| **Knowledge** | 1.119 (1.079,1.160) | <0.001 | 1.129 (1.082,1.178) | <0.001 |
| Gender |  |  |  |  |
| Male |  |  |  |  |
| Female | 0.825 (0.588,1.157) | 0.265 |  |  |
| Age |  |  |  |  |
| 60-69 years |  |  |  |  |
| 70-79 years | 0.936 (0.612,1.434) | 0.762 | 0.923 (0.583,1.464) | 0.735 |
| 80 years and above | 0.622 (0.416,0.928) | 0.020 | 0.497 (0.315,0.784) | 0.003 |
| Residence |  |  |  |  |
| Rural |  |  |  |  |
| Urban | 0.737 (0.365,1.454) | 0.383 |  |  |
| Education |  |  |  |  |
| Junior high school or below |  |  |  |  |
| High school/technical secondary school | 0.886 (0.466,1.691) | 0.713 | 0.594 (0.298,1.183) | 0.138 |
| Associate degree | 1.728 (0.917,3.289) | 0.092 | 1.241 (0.617,2.498) | 0.545 |
| Bachelor's degree or above | 1.513 (0.859,2.688) | 0.154 | 1.004 (0.510,1.976) | 0.992 |
| Marital status |  |  |  |  |
| Married |  |  |  |  |
| Other | 1.041 (0.628,1.732) | 0.876 |  |  |
| Current or pre-retirement occupation |  |  |  |  |
| Healthcare-related industry |  |  |  |  |
| Non-healthcare-related industry | 0.694 (0.397,1.197) | 0.193 |  |  |
| Household per capita monthly income (Yuan) |  |  |  |  |
| <5000 |  |  |  |  |
| 5000-10,000 | 2.263 (1.360,3.819) | 0.002 | 2.380 (1.331,4.257) | 0.003 |
| 10,000-20,000 | 1.977 (1.172,3.378) | 0.012 | 2.084 (1.103,3.936) | 0.024 |
| >20,000 | 2.275 (1.171,4.480) | 0.016 | 1.990 (0.927,4.271) | 0.077 |
| Live alone |  |  |  |  |
| No |  |  |  |  |
| Yes | 1.113 (0.671,1.855) | 0.679 |  |  |
| BMI |  |  |  |  |
| <18.5 |  |  |  |  |
| 18.5-23.9 | 1.093 (0.490,2.471) | 0.829 |  |  |
| 24.0-27.9 | 1.544 (0.669,3.613) | 0.309 |  |  |
| >=28.0 | 1.803 (0.616,5.430) | 0.285 |  |  |
| Comorbidities such as diabetes mellitus, hypertension, hyperlipidemia, hyperuricemia or coronary heart disease |  |  |  |  |
| No |  |  |  |  |
| Yes: | 1.170 (0.809,1.695) | 0.406 |  |  |
| Diagnosed with VTE? |  |  |  |  |
| No |  |  |  |  |
| Yes | 1.044 (0.625,1.748) | 0.869 |  |  |
| Have you received education or information regarding VTE from a hospital or other medical institution? |  |  |  |  |
| No |  |  |  |  |
| Yes | 1.665 (1.091,2.563) | 0.019 | 0.898 (0.537,1.501) | 0.680 |

**Table S3. Univariate and Multivariate Regression Analysis of Practice Scores**

| **Practice** | Univariate Analysis |  | Multivariate Analysis |  |
| --- | --- | --- | --- | --- |
| OR (95%CI) | P | OR (95%CI) | P |
| **Knowledge** | 1.145(1.102,1.190) | <0.001 | 1.121 (1.071,1.172) | <0.001 |
| **Attitude** | 1.134(1.085,1.185) | <0.001 | 1.102 (1.048,1.158) | <0.001 |
| Gender |  |  |  |  |
| Male |  |  |  |  |
| Female | 0.902 (0.643,1.265) | 0.551 |  |  |
| Age |  |  |  |  |
| 60-69 years |  |  |  |  |
| 70-79 years | 1.169 (0.765,1.789) | 0.470 | 1.368 (0.860,2.175) | 0.185 |
| 80 years and above | 1.453 (0.975,2.174) | 0.068 | 1.639 (1.028,2.612) | 0.038 |
| Residence |  |  |  |  |
| Rural |  |  |  |  |
| Urban | 2.976 (1.448,6.598) | 0.004 | 1.828 (0.720,4.643) | 0.205 |
| Education |  |  |  |  |
| Junior high school or below |  |  |  |  |
| High school/technical secondary school | 2.989 (1.513,6.149) | 0.002 | 2.616 (1.180,5.796) | 0.018 |
| Associate degree | 3.328 (1.691,6.828) | 0.001 | 2.526 (1.125,5.671) | 0.025 |
| Bachelor's degree or above | 3.955 (2.140,7.677) | <0.001 | 2.410 (1.115,5.210) | 0.025 |
| Marital status |  |  |  |  |
| Married |  |  |  |  |
| Other | 0.784 (0.471,1.301) | 0.347 |  |  |
| Current or pre-retirement occupation |  |  |  |  |
| Healthcare-related industry |  |  |  |  |
| Non-healthcare-related industry | 0.763 (0.438,1.314) | 0.333 |  |  |
| Household per capita monthly income (Yuan) |  |  |  |  |
| <5000 |  |  |  |  |
| 5000-10,000 | 1.022 (0.620,1.687) | 0.933 |  |  |
| 10,000-20,000 | 1.406 (0.841,2.358) | 0.194 |  |  |
| >20,000 | 1.730 (0.894,3.388) | 0.106 |  |  |
| Live alone |  |  |  |  |
| No |  |  |  |  |
| Yes | 1.251 (0.754,2.095) | 0.388 |  |  |
| BMI |  |  |  |  |
| <18.5 |  |  |  |  |
| 18.5-23.9 | 0.747 (0.325,1.664) | 0.478 |  |  |
| 24.0-27.9 | 0.919 (0.388,2.122) | 0.845 |  |  |
| >=28.0 | 0.475 (0.156,1.391) | 0.179 |  |  |
| Comorbidities such as diabetes mellitus, hypertension, hyperlipidemia, hyperuricemia or coronary heart disease |  |  |  |  |
| No |  |  |  |  |
| Yes: | 0.862 (0.596,1.247) | 0.431 |  |  |
| Diagnosed with VTE? |  |  |  |  |
| No |  |  |  |  |
| Yes | 0.896 (0.536,1.496) | 0.673 |  |  |
| Have you received education or information regarding VTE from a hospital or other medical institution? |  |  |  |  |
| No |  |  |  |  |
| Yes | 1.886 (1.231,2.922) | 0.004 | 0.997 (0.593,1.678) | 0.991 |

**Table S4. Fit Indices for the Structural Equation Model**

| **Indicators** | **Reference** | **Results** |
| --- | --- | --- |
| RMSEA | <0.08 | 0.068 |
| SRMR | <0.08 | 0.064 |
| TLI | >0.80 | 0.894 |
| CFI | >0.80 | 0.903 |

RMSEA, root mean square error of approximation; SRMR, standardized root mean square residual; TLI, Tucker-Lewis index; CFI, comparative fit index.

**Table S5. Mediation Analysis: Direct, Indirect, and Total Effects of Knowledge and Attitudes on Practice**

| **Model paths** | | Total effects | | Direct effects | | Indirect effects | |
| --- | --- | --- | --- | --- | --- | --- | --- |
| β(95%CI) | P | β(95%CI) | P | β(95%CI) | P |
| Attitude |  |  |  |  |  |  |  |
|  | Knowledge | 0.365 (0.287, 0.444) | <0.001 | 0.365 (0.287, 0.444) | <0.001 |  |  |
| Practice |  |  |  |  |  |  |  |
|  | Knowledge | 0.386 (0.303, 0.469) | <0.001 | 0.306 (0.215, 0.398) | <0.001 | 0.080 (0.042, 0.119) | <0.001 |
|  | Attitude | 0.219 (0.126, 0.313) | <0.001 | 0.219 (0.126, 0.313) | <0.001 |  |  |

**Questionnaire Introduction**

The final Chinese-language questionnaire comprised four sections: demographic characteristics, knowledge, attitude, and practice dimensions (Additional file. Questionnaire). The demographic section collected comprehensive information including age, gender, educational level, and current or pre-retirement occupation with specific attention to healthcare-related experience. Additional socioeconomic data included household per capita monthly income, residential status, marital status, and living arrangements. Anthropometric measures involved height and weight measurements for body mass index (BMI = weight kg/height² m²) calculation. The questionnaire also documented the presence of relevant medical conditions, specifically diabetes, hypertension, hyperlipidemia, hyperuricemia, and coronary heart disease. Information regarding previous VTE diagnosis and any prior VTE-related education from medical institutions was also collected. The knowledge section contained 10 items scored on a three-point scale (2="very familiar," 1="heard of," 0="unclear"; range 0-20). The attitude component consisted of 10 items rated on a five-point Likert scale (5="strongly agree" to 1="strongly disagree"; range 10-50). The practice section included eight behavioral items scored from 1 ("never") to 5 ("always"; range 8-40), with an additional item reserved for descriptive analysis, which asked patients about the sources of their knowledge regarding VTE. A validation trap item of common knowledge was incorporated to identify non-attentive responses.

**Chinese and English versions of the questionnaire**

| 问卷编号： | | |
| --- | --- | --- |
| 亲爱的参与者：  我们是医院的医务人员，诚挚邀请您参与我们的课题研究。本研究旨在了解老年人对静脉血栓栓塞（VTE）的知识、态度和实践，为制定科学的干预策略提供依据，这可能在未来帮助到更多的人，改善他们的健康情况。您参与这项研究是自愿的，本研究已通过伦理审查委员会的审查，如果您同意参与本研究，请参阅以下说明。  1.请您完成问卷，答案无关对错，您只需要根据实际情况填写。回答过程中的任何问题您都可以向我们提出，完成后，请您及时提交。  2.本研究是简单的问卷调查，不会对您的身体和心理状况造成伤害，但会涉及一些隐私问题，如您的性别、年龄等，我们会严格保密，不会泄露您的信息，请您放心填写。  3.作为参与者，您可以随时了解与本研究相关的信息和研究进展，如果您决定退出研究，请告知我们，您的数据将不包含在研究结果中。  最后，衷心感谢您能百忙之中抽出时间支持我们的科学研究！  □我已知晓并同意将所收集的数据用于科学研究。  知情同意签字：  参与时间： 年 月 日 | | |
| **第一部分 基本信息** | | |
| **1.您的性别：** | | a.男  b.女 |
| **2.您的年龄： 岁。（问卷星请设置整数验证）** | | |
| **3.您的居住地：** | | a.农村  b.城市 |
| **4.您的教育程度：** | | a.小学及以下  b.初中  c.高中/中专  d.大专  e.本科及以上 |
| **5.您的婚姻状况：** | | a.未婚  b.已婚  c.离异  d.丧偶 |
| **6.您当前（或退休前）的职业是：** | | a.医疗相关行业（如医生、护士、治疗师或公共卫生相关人员等）  b.非医疗相关行业 |
| **7.您的家庭人均月收入为:______元** | | a.<2千  b.2千-5千  c.5千-1万  d.1万-2万  e.>2万 |
| **8.您是否为独居：** | | a.是  b.否 |
| **9.您现在的身高： （厘米）（问卷星中请设置整数验证）** | | |
| **10.您现在的体重： （公斤）（问卷星中请设置整数验证）** | | |
| **11.您是否合并以下疾病：（可多选）** | | 1. 糖尿病 2. 高血压 3. 高脂血症 4. 高尿酸血症 5. 冠心病 6. 以上均无 |
| **12.** **您是否曾经被诊断过静脉血栓塞症：** | | a.是  b.否 |
| **13.您是否接受过医院或其他医疗机构对于静脉血栓栓塞的教育知识宣传：** | | a.有  b.没有 |

| **第二部分 对静脉血栓栓塞的了解情况** | | | |
| --- | --- | --- | --- |
| **下列陈述，您了解的程度是：** | | | | |
| 1. **静脉血栓栓塞症是指血液在静脉内异常凝结形成血栓。** | a.很了解 | b.听说过 | c.不清楚 | |
| 1. **静脉血栓栓塞症主要包括深静脉血栓形成和肺栓塞。** | a.很了解 | b.听说过 | c.不清楚 | |
| 1. **深静脉血栓形成主要发生在下肢，而肺栓塞是血栓进入肺动脉引起的阻塞。** | a.很了解 | b.听说过 | c.不清楚 | |
| 1. **深静脉血栓形成的主要症状包括下肢肢体肿胀、疼痛。** | a.很了解 | b.听说过 | c.不清楚 | |
| 1. **肺栓塞主要表现为呼吸困难。** | a.很了解 | b.听说过 | c.不清楚 | |
| 1. **静脉血栓栓塞症的风险因素包括高龄、手术、久坐、肥胖和恶性肿瘤等。** | a.很了解 | b.听说过 | c.不清楚 | |
| 1. **静脉血栓栓塞症的预防措施主要包括避免久坐、适量运动、穿戴弹力袜和使用抗凝药物等。** | a.很了解 | b.听说过 | c.不清楚 | |
| 1. **机械预防方法，如使用医用弹力袜和间歇充气加压装置，可以帮助预防静脉血栓栓塞症。** | a.很了解 | b.听说过 | c.不清楚 | |
| 1. **老年人由于身体机能下降和多种基础疾病，是静脉血栓栓塞症的高危人群。** | a.很了解 | b.听说过 | c.不清楚 | |
| 1. **静脉血栓栓塞症的常见治疗方法包括使用抗凝药物、溶栓治疗和手术取栓等。** | a.很了解 | b.听说过 | c.不清楚 | |
| 1. **中国的首都是上海。** | a.对 | b.错 | c.不清楚 | |

| **第三部分 对静脉血栓栓塞的态度想法** | | | | | |
| --- | --- | --- | --- | --- | --- |
| 1. **我认为预防静脉血栓栓塞症非常重要。** | a.非常同意 | b.同意 | c.一般 | d.不同意 | e.非常不同意 |
| 1. **我愿意了解更多关于静脉血栓栓塞症的知识。** | a.非常同意 | b.同意 | c.一般 | d.不同意 | e.非常不同意 |
| 1. **我担心自己会得静脉血栓塞症。** | a.非常同意 | b.同意 | c.一般 | d.不同意 | e.非常不同意 |
| 1. **我认为老年人更应该重视静脉血栓栓塞症的预防。** | a.非常同意 | b.同意 | c.一般 | d.不同意 | e.非常不同意 |
| 1. **我相信通过调整生活方式可以有效预防静脉血栓栓塞症。** | a.非常同意 | b.同意 | c.一般 | d.不同意 | e.非常不同意 |
| 1. **我愿意接受医生关于静脉血栓栓塞症预防的建议。** | a.非常同意 | b.同意 | c.一般 | d.不同意 | e.非常不同意 |
| 1. **我认为早期发现和治疗静脉血栓栓塞症可以减少严重并发症的发生。** | a.非常同意 | b.同意 | c.一般 | d.不同意 | e.非常不同意 |
| 1. **我会主动采取措施预防静脉血栓塞症，如穿压力袜。** | a.非常同意 | b.同意 | c.一般 | d.不同意 | e.非常不同意 |
| 1. **我认为在老年人中进行静脉血栓栓塞症的防治教育是必要的。** | a.非常同意 | b.同意 | c.一般 | d.不同意 | e.非常不同意 |
| 1. **我认为静脉血栓栓塞症的防治需要全社会的共同努力。** | a.非常同意 | b.同意 | c.一般 | d.不同意 | e.非常不同意 |

| **第四部分 对静脉血栓栓塞的行为实践**  总是：几乎100%能做到；经常：约能做到70%以上；有时：约能做到40-70%；很少：约能做到10-40%；从不：从来做不到或仅能做到10%以下 | | | | | |
| --- | --- | --- | --- | --- | --- |
| 1. **我定期进行健康检查。** | a.总是 | b.经常 | c.有时 | d.很少 | e.从不 |
| 1. **我每天进行适量的身体活动以预防静脉血栓栓塞症。** | a.总是 | b.经常 | c.有时 | d.很少 | e.从不 |
| 1. **我避免长时间久坐或不活动。** | a.总是 | b.经常 | c.有时 | d.很少 | e.从不 |
| 1. **我保持健康的饮食习惯。** | a.总是 | b.经常 | c.有时 | d.很少 | e.从不 |
| 1. **我每天饮用足够的水。** | a.总是 | b.经常 | c.有时 | d.很少 | e.从不 |
| 1. **我使用医用弹力袜或其他机械预防措施来预防静脉血栓栓塞症。** | a.总是 | b.经常 | c.有时 | d.很少 | e.从不 |
| 1. **我尽量避免直接吸烟或吸二手烟，以降低静脉血栓栓塞症的风险。** | a.总是 | b.经常 | c.有时 | d.很少 | e.从不 |
| 1. **我注意控制体重以减少****静脉血栓栓塞症的发生。** | a.总是 | b.经常 | c.有时 | d.很少 | e.从不 |
| **9.您了解静脉血栓栓塞症的途径？（可多选）**   1. 主管医生或其他医生科普、医院讲座和宣教 2. 新媒体（微信、微博、抖音、小红书等） 3. 多媒体（电视、报纸等） 4. 亲戚朋友或病友交流 5. 社区宣传 | | | | | |

| Questionnaire Number: |
| --- |
| Dear Participants,  We are medical staff from the hospital, sincerely inviting you to participate in our research project. This study aims to understand the knowledge, attitudes, and practices of the elderly regarding venous thromboembolism (VTE), providing a basis for developing scientific intervention strategies that may assist more individuals in the future and improve their health outcomes. Your participation in this study is voluntary, and it has been approved by the ethics review committee. If you agree to participate in this study, please refer to the following instructions.  1. Please complete the questionnaire. There are no right or wrong answers. You only need to fill in according to the actual situation. You can ask us any questions during the answering process. Please submit it promptly after completion.  2. This study is a simple questionnaire survey, which will not cause harm to your physical and mental health. However, it will involve some privacy issues, such as your gender, age, etc. We will strictly protect your confidentiality and will not disclose your information. Please feel free to fill it out.  3. As a participant, you can always understand the information and research progress related to this study. If you decide to withdraw from the study, please inform us. Your data will not be included in the research results.  Finally, we sincerely thank you for taking the time to support our scientific research amidst your busy schedule!  □ I am aware of and agree to the use of the collected data for scientific research.  Informed Consent Signature:  Date of Participation: Year Month Day |

| **Section One: Basic Information** | |
| --- | --- |
| 1. Your gender: | a. Male  b.Famale |
| 2.Your age： Years（Please set integer validation in Questionnaire Star.） | |
| 3.Your place of residence: | a. Rural  b. Urban |
| 4. Your education level: | a. Primary school and below  b. Junior high school  c. High school/Technical secondary school  d. Associate degree  e. Bachelor's degree or above |
| 5. Your marital status: | a. Unmarried  b. Married  c. Divorced  d. Widowed |
| 6. Your current (or pre-retirement) occupation is: | a. Healthcare-related industry (such as doctors, nurses, therapists, or public health personnel)  b. Non-healthcare-related industry |
| 7. Your household average monthly income is: ______ yuan | a. <2,000  b. 2,000–5,000  c. 5,000–10,000  d. 10,000–20,000  e. >20,000 |
| 8. Do you live alone? | a. Yes  b. No |
| 9. Your current height: ______ (centimeters) | |
| 10. Your current weight: ______ (kilograms) | |
| 11. Do you have any of the following conditions? (Multiple selections are allowed) | a. Diabetes  b. Hypertension  c. Hyperlipidaemia  d. Hyperuricemia  e. Coronary heart disease  f. None of the above |
| 12. Have you ever been diagnosed with venous thromboembolism? | a. Yes  b. No |
| 13. Have you received education or information regarding venous thromboembolism from a hospital or other medical institution? | a. Yes  b. No |

| **Section Two: Understanding of Venous Thromboembolism** | | | |
| --- | --- | --- | --- |
| The following statements, to what extent do you understand: | | | | |
| 1. Venous thromboembolism refers to the abnormal coagulation of blood within the veins, forming a thrombus. | a. Very Familiar | b. Heard of It | c. Unclear | |
| 2. Venous thromboembolism primarily includes deep vein thrombosis and pulmonary embolism. | a. Very Familiar | b. Heard of It | c. Unclear | |
| 3. Deep vein thrombosis mainly occurs in the lower extremities, while pulmonary embolism is caused by the obstruction of the pulmonary artery due to a thrombus. | a. Very Familiar | b. Heard of It | c. Unclear | |
| 4. The main symptoms of deep vein thrombosis include swelling and pain in the lower limbs. | a. Very Familiar | b. Heard of It | c. Unclear | |
| 5. Pulmonary embolism primarily manifests as dyspnoea. | a. Very Familiar | b. Heard of It | c. Unclear | |
| 6. Risk factors for venous thromboembolism include advanced age, surgery, prolonged immobility, obesity, and malignancies. | a. Very Familiar | b. Heard of It | c. Unclear | |
| 7. Preventive measures for venous thromboembolism primarily involve avoiding prolonged immobility, engaging in moderate exercise, wearing compression stockings, and using anticoagulant medications. | a. Very Familiar | b. Heard of It | c. Unclear | |
| 8. Mechanical preventive methods, such as the use of medical compression stockings and intermittent pneumatic compression devices, can aid in the prevention of venous thromboembolism. | a. Very Familiar | b. Heard of It | c. Unclear | |
| 9. The elderly, due to decreased physiological function and various underlying diseases, constitute a high-risk population for venous thromboembolism. | a. Very Familiar | b. Heard of It | c. Unclear | |
| 10. Common treatment methods for venous thromboembolism include the use of anticoagulant medications, thrombolytic therapy, and surgical thrombectomy. | a. Very Familiar | b. Heard of It | c. Unclear | |
| 11. The capital of China is Shanghai. | a. True | b. False | c. Unclear | |

| **Section Three: Attitudes Towards Venous Thromboembolism** | | | | | |
| --- | --- | --- | --- | --- | --- |
| 1. I believe that the prevention of venous thromboembolism is very important. | a. Strongly Agree | b. Agree | c. Neutral | d. Disagree | e. Strongly Disagree |
| 2. I am willing to learn more about venous thromboembolism. | a. Strongly Agree | b. Agree | c. Neutral | d. Disagree | e. Strongly Disagree |
| 3. I am concerned that I may develop venous thromboembolism. | a. Strongly Agree | b. Agree | c. Neutral | d. Disagree | e. Strongly Disagree |
| 4. I believe that elderly individuals should place greater emphasis on the prevention of venous thromboembolism. | a. Strongly Agree | b. Agree | c. Neutral | d. Disagree | e. Strongly Disagree |
| 5. I believe that lifestyle adjustments can effectively prevent venous thromboembolism. | a. Strongly Agree | b. Agree | c. Neutral | d. Disagree | e. Strongly Disagree |
| 6. I am willing to accept medical advice regarding the prevention of venous thromboembolism. | a. Strongly Agree | b. Agree | c. Neutral | d. Disagree | e. Strongly Disagree |
| 7. I believe that early detection and treatment of venous thromboembolism can reduce the occurrence of severe complications. | a. Strongly Agree | b. Agree | c. Neutral | d. Disagree | e. Strongly Disagree |
| 8. I will proactively take measures to prevent venous thromboembolism, such as wearing compression stockings. | a. Strongly Agree | b. Agree | c. Neutral | d. Disagree | e. Strongly Disagree |
| 9. I believe that it is necessary to conduct education on the prevention and treatment of venous thromboembolism among elderly individuals. | a. Strongly Agree | b. Agree | c. Neutral | d. Disagree | e. Strongly Disagree |
| 10. I believe that the prevention and treatment of venous thromboembolism require a collective effort from society as a whole. | a. Strongly Agree | b. Agree | c. Neutral | d. Disagree | e. Strongly Disagree |

| **Section Four: Practices Related to Venous Thromboembolism**  Always: Almost 100% achievable; Often: About 70% or more achievable; Sometimes: About 40-70% achievable; Rarely: About 10-40% achievable; Never: Cannot achieve or only achieve less than 10% | | | | | |
| --- | --- | --- | --- | --- | --- |
| 1. I undergo regular health check-ups. | a. Always | b. Often | c. Sometimes | d. Occasionally | e. Never |
| 2. I engage in adequate physical activity daily to prevent venous thromboembolism. | a. Always | b. Often | c. Sometimes | d. Occasionally | e. Never |
| 3. I avoid prolonged periods of sitting or inactivity. | a. Always | b. Often | c. Sometimes | d. Occasionally | e. Never |
| 4. I maintain healthy dietary habits. | a. Always | b. Often | c. Sometimes | d. Occasionally | e. Never |
| 5. I drink sufficient water daily. | a. Always | b. Often | c. Sometimes | d. Occasionally | e. Never |
| 6. I use medical compression stockings or other mechanical preventive measures to prevent venous thromboembolism. | a. Always | b. Often | c. Sometimes | d. Occasionally | e. Never |
| 7. I make an effort to avoid direct smoking or exposure to second-hand smoke to reduce the risk of venous thromboembolism. | a. Always | b. Often | c. Sometimes | d. Occasionally | e. Never |
| 8. I pay attention to weight management to decrease the incidence of venous thromboembolism. | a. Always | b. Often | c. Sometimes | d. Occasionally | e. Never |
| 9. How do you understand the pathways of venous thromboembolism? (Multiple selections are allowed)  a. Information from supervising doctors or other medical professionals, hospital lectures, and educational campaigns  b. New media (WeChat, Weibo, Douyin, Xiaohongshu, etc.)  c. Multimedia (television, newspapers, etc.)  d. Communication with relatives, friends, or fellow patients  e. Community outreach | | | | | |
